# Supplementary material for: Synthesis, structure, and investigation of unique magnetic properties in two novel Mn-based coordination polymers
Source: Royal Society of Chemistry journal article supplement (doi:10.1039/d3ce01060k), 2023-01-01
Supplement: d3ce01060k1.pdf [file d3ce01060k1.pdf]

## Synthesis, Structural, and Investigation of Unique Magnetic Properties in Two novel Mn-Based Coordination Polymers

### Table of Contents

|                                                                                               |   |
|-----------------------------------------------------------------------------------------------|---|
| <b>Table S1.</b> Crystal data and structure refinement parameters of <b>1</b> .....           | 2 |
| <b>Table S2.</b> Crystal data and structure refinement parameters of <b>2</b> .....           | 3 |
| <b>Table S3.</b> Partial bond lengths (Å) and bond angles (°) of <b>1</b> .....               | 4 |
| <b>Table S4.</b> Partial bond lengths (Å) and bond angles (°) of <b>2</b> .....               | 4 |
| <b>Table S5.</b> Structural parameters of $\pi \dots \pi$ interactions of <b>1</b> .....      | 5 |
| <b>Table S6.</b> Structural parameters of $\pi \dots \pi$ interactions of <b>2</b> .....      | 5 |
| <b>Table S7.</b> Hydrogen bond parameters of <b>1</b> and <b>2</b> .....                      | 6 |
| <b>Figure S1.</b> PXRD of <b>1</b> .....                                                      | 6 |
| <b>Figure S2.</b> PXRD of <b>2</b> .....                                                      | 7 |
| <b>Figure S3.</b> FT-IR of H <sub>2</sub> L, <b>1</b> and <b>2</b> .....                      | 7 |
| <b>Figure S4.</b> The 3D structure of <b>2</b> and $\pi \dots \pi$ stacking interactions..... | 8 |
| <b>Figure S5.</b> hydrogen bond between <b>2</b> and dib.....                                 | 8 |
| <b>Figure S6.</b> Interactions between dib and <b>2</b> .....                                 | 9 |

**Table S1.** Crystal data and structure refinement parameters of **1**

| Compound                                                                                  | <b>1</b>                                                         |
|-------------------------------------------------------------------------------------------|------------------------------------------------------------------|
| Formula                                                                                   | C <sub>30</sub> H <sub>18</sub> MnN <sub>4</sub> O <sub>4</sub>  |
| Formula weight                                                                            | 553.42                                                           |
| Temperature (K)                                                                           | 193.0                                                            |
| Crystal system                                                                            | Monoclinic                                                       |
| Space group                                                                               | <i>P</i> 2/n                                                     |
| <i>a</i> (Å), <i>b</i> (Å), <i>c</i> (Å)                                                  | 7.9590(6), 10.7872(8), 29.582(2)                                 |
| $\alpha$ (°), $\beta$ (°), $\gamma$ (°)                                                   | 90, 93.461(4), 90                                                |
| <i>V</i> (Å <sup>3</sup> )                                                                | 2535.1(3)                                                        |
| <i>Z</i>                                                                                  | 4                                                                |
| <i>D</i> <sub>calc</sub> (Mg m <sup>-3</sup> )                                            | 1.450                                                            |
| $\mu$ (mm <sup>-1</sup> )                                                                 | 3.146                                                            |
| <i>F</i> (000)                                                                            | 1132.0                                                           |
| Crystal size (mm)                                                                         | 0.12 × 0.1 × 0.1                                                 |
| $2\theta$ range (°)                                                                       | 7.59 to 120.092                                                  |
| Index ranges                                                                              | -10 ≤ <i>h</i> ≤ 9<br>-13 ≤ <i>K</i> ≤ 13<br>-38 ≤ <i>L</i> ≤ 37 |
| Reflections collected                                                                     | 24117                                                            |
| Independent reflection                                                                    | 5632 [ <i>R</i> <sub>int</sub> = 0.0558]                         |
| Data/restraints/parameters                                                                | 5632/126/398                                                     |
| Final <i>R</i> <sub>1</sub> , <i>wR</i> <sub>2</sub> indices [ <i>I</i> > 2σ( <i>I</i> )] | 0.0360, 0.0876                                                   |
| <i>R</i> <sub>1</sub> , <i>wR</i> <sub>2</sub> indices (all data)                         | 0.0500, 0.0943                                                   |
| <i>GOF</i>                                                                                | 1.032                                                            |
| $\Delta\rho_{\text{max,min}}$ (e Å <sup>-3</sup> )                                        | 0.26/-0.47                                                       |

**Table S1.** Crystal data and structure refinement parameters of **2**

| Compound                                                                                  | <b>2</b>                                                          |
|-------------------------------------------------------------------------------------------|-------------------------------------------------------------------|
| Formula                                                                                   | C <sub>24</sub> H <sub>17</sub> MnN <sub>4</sub> O <sub>5</sub>   |
| Formula weight                                                                            | 496.35                                                            |
| Temperature (K)                                                                           | 173.0                                                             |
| Crystal system                                                                            | triclinic                                                         |
| Space group                                                                               | <i>P</i> -1                                                       |
| <i>a</i> (Å), <i>b</i> (Å), <i>c</i> (Å)                                                  | 9.5840(2), 10.5520(3), 11.7635(3)                                 |
| $\alpha$ (°), $\beta$ (°), $\gamma$ (°)                                                   | 93.8320(10), 111.2460(10), 108.9600(10)                           |
| <i>V</i> (Å <sup>3</sup> )                                                                | 1025.39(5)                                                        |
| <i>Z</i>                                                                                  | 2                                                                 |
| <i>D</i> <sub>calc</sub> (Mg m <sup>-3</sup> )                                            | 1.608                                                             |
| $\mu$ (mm <sup>-1</sup> )                                                                 | 5.653                                                             |
| <i>F</i> (000)                                                                            | 508.0                                                             |
| Crystal size (mm)                                                                         | 0.25 × 0.23 × 0.21                                                |
| $2\theta$ range (°)                                                                       | 10.51 to 144.192                                                  |
| Index ranges                                                                              | -11 ≤ <i>h</i> ≤ 11<br>-13 ≤ <i>k</i> ≤ 13<br>-14 ≤ <i>l</i> ≤ 14 |
| Reflections collected                                                                     | 12217                                                             |
| Independent reflection                                                                    | 3960 [ <i>R</i> <sub>int</sub> = 0.0381]                          |
| Data/restraints/parameters                                                                | 3960/27/357                                                       |
| Final <i>R</i> <sub>1</sub> , <i>wR</i> <sub>2</sub> indices [ <i>I</i> > 2σ( <i>I</i> )] | 0.0299, 0.0763                                                    |
| <i>R</i> <sub>1</sub> , <i>wR</i> <sub>2</sub> indices (all data)                         | 0.0327, 0.0786                                                    |
| <i>GOF</i>                                                                                | 1.049                                                             |
| $\Delta\rho_{\text{max,min}}$ (e Å <sup>-3</sup> )                                        | 0.37/-0.21                                                        |

**Table S3.** Bond length (Å) and bond angle (°) of **1**

| <b>1</b>            |            |                     |            |            |            |
|---------------------|------------|---------------------|------------|------------|------------|
| Mn1-O(3)            | 2.1025(13) | Mn1-O(1)#1          | 2.2670(13) | Mn1-O(4)#2 | 2.1156(12) |
| Mn1-O(2)#1          | 2.2638(12) | Mn1-N(1)            | 2.2638(15) | Mn1-N(2)   | 2.2658(15) |
| O(3)-Mn(1)-O(1)#1   | 148.33(5)  | O(3)-Mn(1)-O(4)#2   | 95.73(5)   |            |            |
| O(3)-Mn(1)-O(2)#1   | 91.47(5)   | O(3)-Mn(1)-N(1)     | 85.13(5)   |            |            |
| O(2)#1-Mn(1)-N(1)   | 144.08(5)  | O(4)#2-Mn(1)-O(1)#1 | 100.34(5)  |            |            |
| O(4)#2-Mn(1)-O(2)#1 | 105.09(7)  | O(4)#2-Mn(1)-N(1)   | 95.02(5)   |            |            |
| O(4)#2-Mn(1)-N(2)   | 166.33(5)  | O(2)#1-Mn(1)-O(1)#1 | 58.09(7)   |            |            |
| O(2)#1-Mn(1)-N(2)   | 88.51(5)   | N(2)-Mn(1)-O(1)#1   | 85.52(5)   |            |            |
| N(2)-Mn(1)-N(1)     | 72.54(5)   |                     |            |            |            |

Symmetry codes for #1: 2-x, 1-y, 1-z; #2: 3/2-x, +y, 1/2-z.

**Table S4.** Bond length (Å) and bond angle (°) of **2**

| <b>2</b>            |            |                     |            |            |            |
|---------------------|------------|---------------------|------------|------------|------------|
| Mn1-O(2)#1          | 2.1475(12) | Mn1-O(1)            | 2.1010(12) | Mn1-O(5)   | 2.1634(13) |
| Mn1-O(4)#2          | 2.3104(12) | Mn1-O(3)#2          | 2.2430(14) | Mn1-N(1)#3 | 2.3351(14) |
| O(2)#1-Mn(1)-O(5)   | 167.45(5)  | O(2)#1-Mn(1)-O(4)#2 | 88.12(5)   |            |            |
| O(2)#1-Mn(1)-O(3)#2 | 91.03(5)   | O(2)#1-Mn(1)-N(1)#3 | 84.46(5)   |            |            |
| O(1)-Mn(1)-O(2)#1   | 102.29(5)  | O(1)-Mn(1)-O(5)     | 88.41(5)   |            |            |
| O(1)-Mn(1)-O(4)#2   | 154.51(5)  | O(1)-Mn(1)-O(3)#2   | 98.46(5)   |            |            |
| O(1)-Mn(1)-N(1)#3   | 110.07(5)  | O(5)-Mn(1)-O(4)#2   | 84.77(5)   |            |            |
| O(5)-Mn(1)-O(3)#2   | 93.88(6)   | O(5)-Mn(1)-N(1)#3   | 85.72(5)   |            |            |
| O(4)#2-Mn(1)-N(1)#3 | 93.90(5)   | O(3)#2-Mn(1)-O(4)#2 | 57.69(5)   |            |            |
| O(3)#2-Mn(1)-N(1)#3 | 151.43(5)  |                     |            |            |            |

Symmetry codes for #1: 2-x, 2-y, 2-z; #2: 2+x, 1+y, 1+z; #3: 1+x, 1+y, +z.

**Table S5.** Structural parameters of  $\pi \dots \pi$  interactions of **1**.

| $\pi \dots \pi$ | $\alpha$ | DC         | $\beta$ | DZ          |
|-----------------|----------|------------|---------|-------------|
| Cg(4)⋯Cg(4)#1   | 4.29(9)  | 3.6206(9)  | 18.2    | 3.4393(7)   |
| Cg(9)⋯Cg(10)#2  | 6.31(9)  | 3.6379(5)  | 22.4    | -3.4860(4)  |
| Cg(8)⋯Cg(8)#3   | 2.93(9)  | 3.6884(12) | 22.9    | -3.3974(8)  |
| Cg(4)⋯Cg(8)#3   | 3.85(11) | 3.7165(11) | 24      | -3.4869(7)  |
| Cg(4)⋯Cg(5)#3   | 3.43(8)  | 3.7519(11) | 20.1    | -3.4803(7)  |
| Cg(3)⋯Cg(4)#3   | 5.92(7)  | 3.7846(9)  | 24.2    | -3.5637(6)  |
| Cg(3)⋯Cg(3)#3   | 7.49(6)  | 3.8060(9)  | 20.1    | -3.5745(6)  |
| Cg(9)⋯Cg(2)#4   | 1.88(8)  | 4.1994(10) | 36.7    | -3.4465(7)  |
| Cg(3)⋯Cg(8)#3   | 5.25(8)  | 4.4003(11) | 40.6    | -3.5405(6)  |
| Cg(4)⋯Cg(4)#3   | 4.29(8)  | 4.4789(10) | 39.6    | -3.4497(7)  |
| Cg(3)⋯Cg(4)#1   | 5.92(7)  | 4.7630(10) | 43.2    | 3.3253(6)   |
| Cg(4)⋯Cg(8)#1   | 3.85(8)  | 4.8731(11) | 44.2    | 3.4942(7)   |
| Cg(3)⋯Cg(5)#3   | 4.70(8)  | 5.0108(11) | 46      | -3.5075(6)  |
| Cg(5)⋯Cg(8)#3   | 2.33(9)  | 5.0496(12) | 47.8    | -3.4641(8)  |
| Cg(6)⋯Cg(6)#2   | 0.03(13) | 5.3509(16) | 42      | -3.9795(11) |
| Cg(6)⋯Cg(6)#2   | 0.03(13) | 5.3509(16) | 52.6    | 3.939(8)    |
| Cg(9)⋯Cg(4)#4   | 19.8     | 5.3160(11) | 81.1    | 5.0005(7)   |
| Cg(10)⋯Cg(10)#4 | 0.02(9)  | 5.7653(12) | 44.9    | 4.0861(8)   |

$\alpha$ : dihedral angle between mean planes of the rings ( $^\circ$ ), DC: distance between ring centroids (nm),  $\beta$ : angle between DC vector and normal to plane (I) ( $^\circ$ ), DZ: perpendicular distance of the centroids of ring(I) on plane of ring(II) (nm). Symmetry codes: #1 5/2-x, y, 1/2-z; #2 1-x, 1-y, 1-z, #3: 3/2-x, y, 1/2-z, #4: 1+x, y, z, #5: 1-x, 2-y, 1-z, #6: 1+x, -1+y, z. Rings: Cg(2): O1, C30, O2, Mn1; Cg(3): Mn1, N1, C5, C6, N2; Cg(4): N1, C1, C2, C3, C4, C5; Cg(5): N2, C6, C7, C10, C11, C12; Cg(6): N3, C20, C21, N4, C22 C23; Cg(8): C4, C5, C6, C7, C8, C9; Cg(9): C14, C15, C16, C17, C18, C19; Cg(10): C24, C25, C26, C27, C28, C29.

**Table S6.** Structural parameters of  $\pi \dots \pi$  interactions of **2**.

| $\pi \dots \pi$ | $\alpha$  | DC         | $\beta$ | DZ         |
|-----------------|-----------|------------|---------|------------|
| Cg(2)⋯Cg(3)#1   | 14.55(9)  | 4.5999(11) | 41.6    | 3.5008(7)  |
| Cg(3)⋯Cg(2)#1   | 14.55(9)  | 5.5120(11) | 50.7    | -3.4931(7) |
| Cg(4)⋯Cg(4)#2   | 0.00(8)   | 4.244(12)  | 22.0    | 3.9341(8)  |
| Cg(5)⋯Cg(3)#1   | 11.4(3)   | 3.745(3)   | 19.9    | 3.647(3)   |
| Cg(5)⋯Cg(5)#1   | 0.00(4)   | 4.850(5)   | 43      | 3.547(4)   |
| Cg(5)⋯Cg(5)#3   | 0.00(12)  | 5.410(5)   | 38.2    | -4.251(3)  |
| Cg(7)⋯Cg(4)#4   | 13.88(11) | 4.1329(13) | 29.5    | -3.0020(9) |

$\alpha$ : dihedral angle between mean planes of the rings ( $^\circ$ ), DC: distance between ring centroids (nm),  $\beta$ : angle between DC vector and normal to plane (I) ( $^\circ$ ), DZ: perpendicular distance of the centroids of ring(I) on plane of ring(II) (nm), S: distance between ring centroid(I) and perpendicular projection of ring centroid(II) on ring (I) (nm). Symmetry codes: #1 -x, -y, 1-z; #2 1-x, 1-y, 2-z; #3 -1-x, -y, 1-z. Rings: Cg(2): Mn1, O3, C18, O4; Cg(3): N1, C9, C8, N2, C11, C10; Cg(4): C2, C3, C4, C5, C6, C7; Cg(5): C12, C13, C14, C15, C16, C17; Cg(7): N3, C19, N4, C21, C20.

**Table S7.** Hydrogen bond parameters of **1** and **2**.

| D-H...A       | d(D-H)/Å  | d(H...A)/Å | d(D...A)/Å | ∠DHA / (°) |
|---------------|-----------|------------|------------|------------|
| 1             |           |            |            |            |
| C1-H1...O1    | 0.95      | 2.45       | 3.192(2)   | 135        |
| 2             |           |            |            |            |
| O5-H5A...O4#1 | 0.85(3)   | 1.85(3)    | 2.695(2)   | 174(2)     |
| O5-H5B...N3#1 | 0.848(17) | 1.895(19)  | 2.734(2)   | 171(3)     |
| C4-H4...O5#2  | 0.95      | 2.51       | 3.368(2)   | 150)s      |
| C7-H7...O4#3  | 0.95      | 2.42       | 3.301(2)   | 154)s      |

Symmetry codes: ; #1: 1/2+x, 1-y, -1/2-z for **1**. #1: -1+x, -1+y, z; #2: 2-x, 1-y, 2-z; #3: -x, 1-y, 1-z for **2**

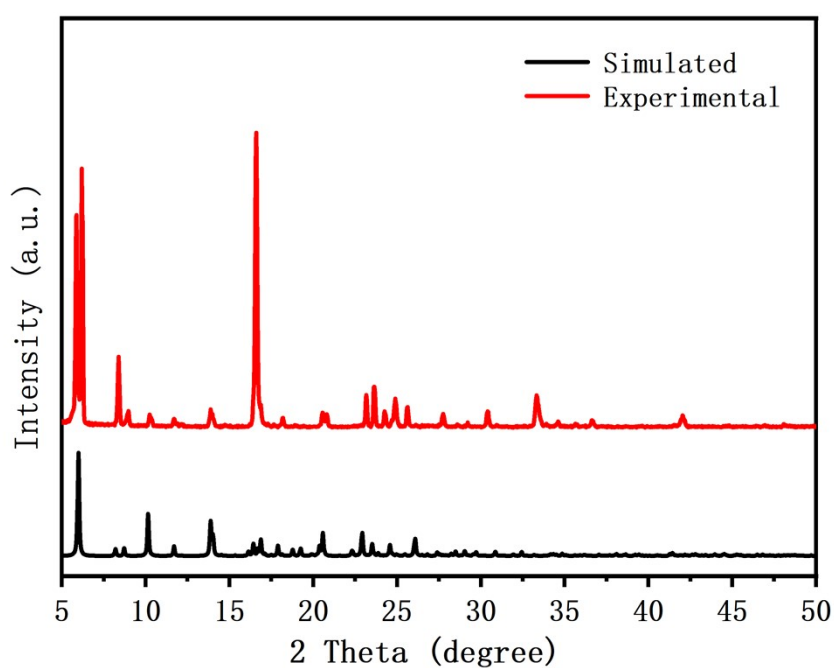**Figure S1.** PXRD simulation pattern of **1**, PXRD pattern of **1**.

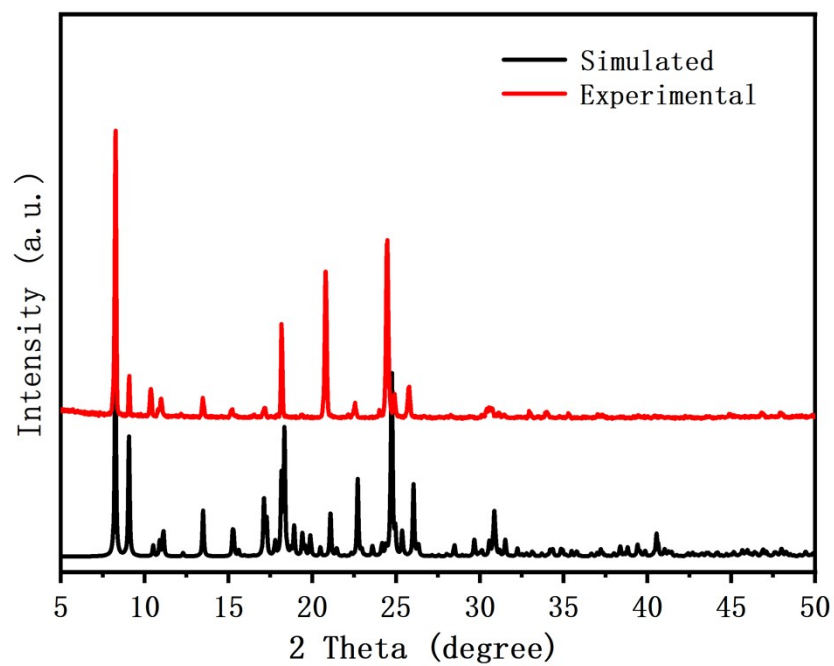

**Figure S2.** PXRD simulation pattern of 2, PXRD pattern of 2.

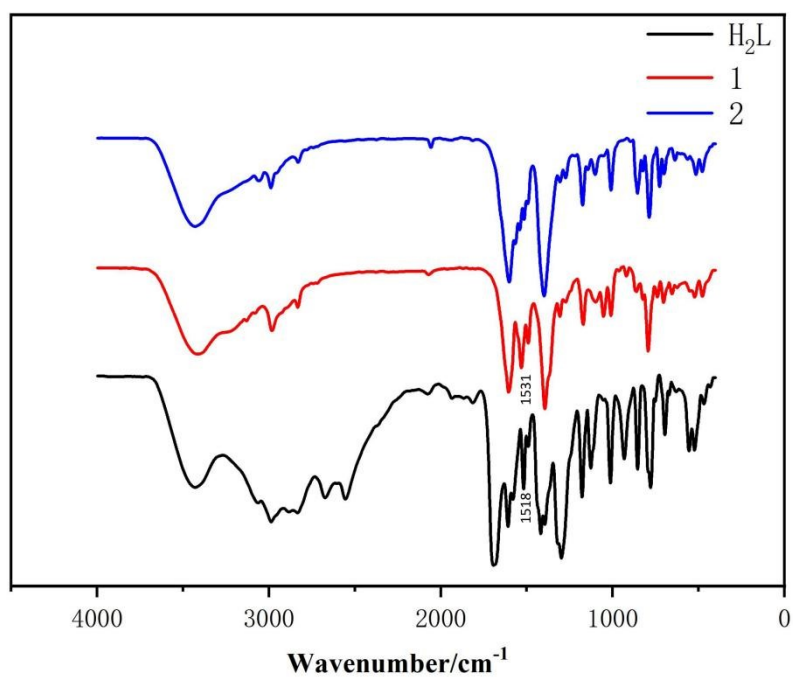

**Figure S3.** FT-IR of H<sub>2</sub>L, 1 and 2.

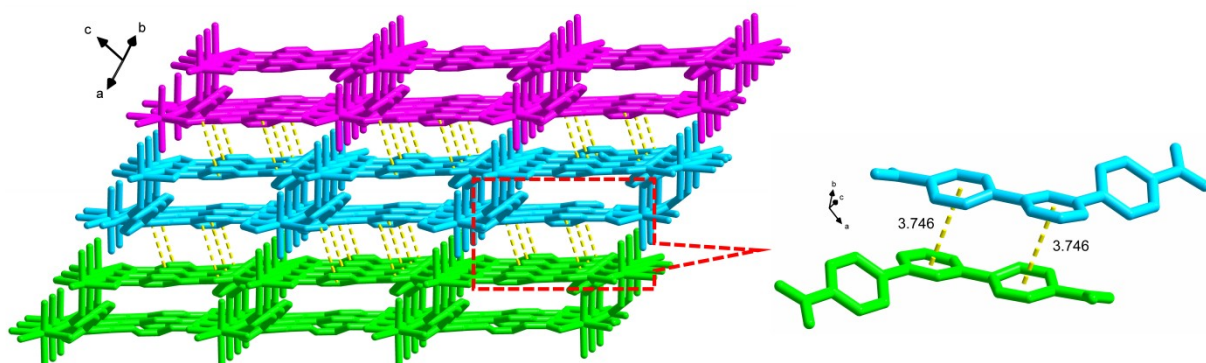

Figure S4. The 3D structure of **2** and  $\pi\cdots\pi$  stacking interactions.

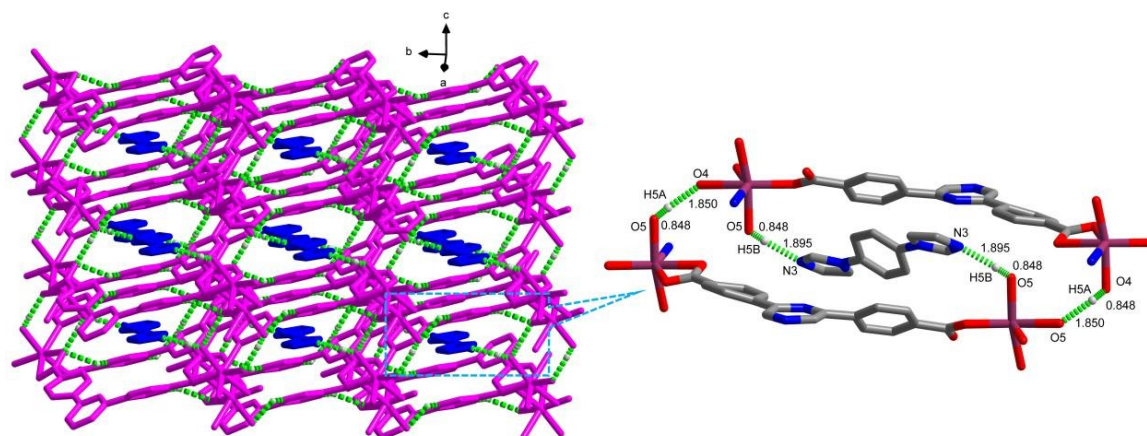

Figure S5. hydrogen bond between **2** and dib.



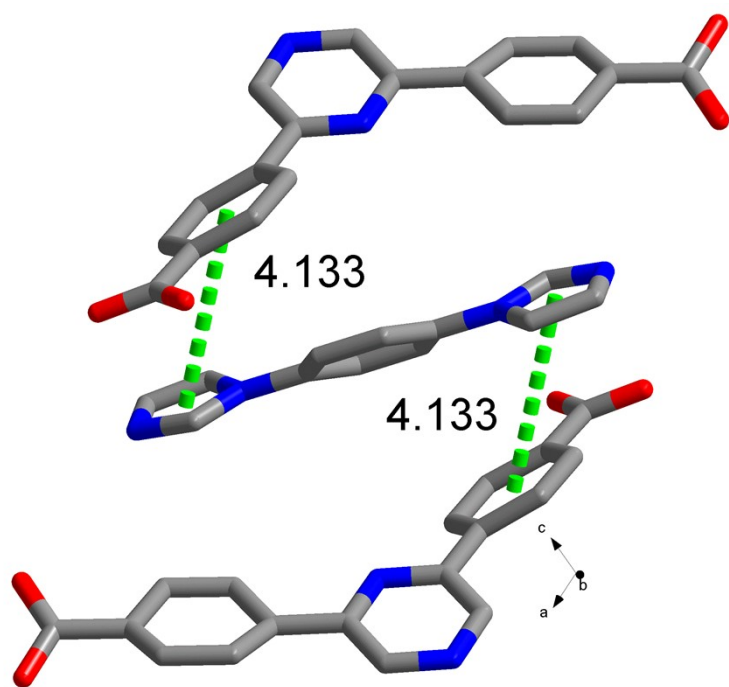

**Figure S6.**  $\pi\cdots\pi$  stacking interactions between **2** and dib.
